# Supplementary material
Source: PubMed Central journal article supplement (PMC8709695)
Supplement: NIHMS1757359-supplement-1.pdf [file NIHMS1757359-supplement-1.pdf]

Table S1: baseline demographics of the included and excluded samples.

|                                   | <i>Primary Analysis<br/>(n, %)</i> | <i>Excluded (n, %)</i> | <i>P value</i> |
|-----------------------------------|------------------------------------|------------------------|----------------|
| <i>N</i>                          | 1,698                              | 961                    |                |
| <i>Age (mean ± SD), years</i>     | 45.7±16.9                          | 45.0±16.6              | 0.295          |
| <i>Age distribution</i>           |                                    |                        | 0.135          |
| <i>&lt;18</i>                     | 23 (1.4)                           | 7 (0.7)                |                |
| <i>18-29</i>                      | 375 (22.1)                         | 209 (21.7)             |                |
| <i>30-49</i>                      | 549 (32.3)                         | 343 (35.7)             |                |
| <i>50-65</i>                      | 498 (29.3)                         | 283 (29.4)             |                |
| <i>65+</i>                        | 253 (14.9)                         | 119 (12.4)             |                |
| <i>Sex (male)</i>                 | 720 (42.4)                         | 441 (45.9)             | 0.089          |
| <i>Race</i>                       |                                    |                        |                |
| <i>White</i>                      | 1,559 (91.8)                       | 865 (90.0)             |                |
| <i>Native American</i>            | 12 (0.7)                           | 16 (1.7)               |                |
| <i>Asian</i>                      | 50 (2.9)                           | 20 (2.1)               |                |
| <i>Black</i>                      | 30 (1.8)                           | 19 (2.0)               |                |
| <i>Pacific Islander</i>           | 2 (0.1)                            | 1 (0.1)                |                |
| <i>Other</i>                      | 14 (0.8)                           | 9 (0.9)                |                |
| <i>Unknown</i>                    | 8 (0.5)                            | 10 (1.0)               |                |
| <i>Ethnicity</i>                  |                                    |                        | 0.333          |
| <i>Latino/Latina</i>              | 31 (1.8)                           | 21 (2.2)               |                |
| <i>Not Latino/Latina</i>          | 847 (49.9)                         | 452 (47.0)             |                |
| <i>Unknown</i>                    | 820 (48.3)                         | 488 (50.8)             |                |
| <i>Employment in past 30 days</i> |                                    |                        | <0.001         |
| <i>Full-time</i>                  | 222 (13.1)                         | 113 (11.8)             |                |
| <i>Part-time</i>                  | 104 (6.1)                          | 55 (5.7)               |                |
| <i>None</i>                       | 1,065 (62.7)                       | 610 (63.5)             |                |
| <i>Unknown</i>                    | 307 (18.1)                         | 183 (19.0)             |                |
| <i>Student (yes)</i>              | 231 (13.6)                         | 118 (12.3)             |                |
| <i>On disability (yes)</i>        | 451 (26.6)                         | 314 (32.7)             |                |
| <i>Education</i>                  |                                    |                        | <0.001         |
| <i>8th Grade or Less</i>          | 8 (0.5)                            | 4 (0.4)                |                |
| <i>Some high school</i>           | 50 (2.9)                           | 29 (3.0)               |                |
| <i>High school graduate/GED</i>   | 182 (10.7)                         | 133 (13.8)             |                |
| <i>Some college</i>               | 482 (28.4)                         | 317 (33.0)             |                |
| <i>4 year college graduate</i>    | 440 (25.9)                         | 218 (22.7)             |                |
| <i>Postcollege education</i>      | 522 (30.7)                         | 233 (24.2)             |                |
| <i>Number missing</i>             | 14 (0.8)                           | 27 (2.8)               |                |

|                                      |              |            |        |
|--------------------------------------|--------------|------------|--------|
| <i>Subjective Physical Health</i>    |              |            | <0.001 |
| <i>Very poor</i>                     | 22 (1.3)     | 21 (2.2)   |        |
| <i>Poor</i>                          | 213 (12.5)   | 136 (14.2) |        |
| <i>Good</i>                          | 939 (55.3)   | 542 (56.4) |        |
| <i>Very Good</i>                     | 398 (23.4)   | 178 (18.5) |        |
| <i>Excellent</i>                     | 112 (6.6)    | 56 (5.8)   |        |
| <i>Number missing</i>                | 14 (0.8)     | 28 (2.9)   |        |
| <i>Treatment setting for ECT #1</i>  |              |            | <0.001 |
| <i>Inpatient</i>                     | 1,109 (65.3) | 710 (73.9) |        |
| <i>Outpatient</i>                    | 576 (33.9)   | 238 (24.8) |        |
| <i>Number missing</i>                | 13 (0.8)     | 13 (1.4)   |        |
| <i>Clinical Diagnosis</i>            |              |            | <0.001 |
| <i>Major depressive disorder</i>     | 1,271 (74.9) | 656 (68.3) |        |
| <i>Bipolar affective disorder</i>    | 342 (20.1)   | 227 (23.6) |        |
| <i>Other</i>                         | 85 (5.0)     | 78 (8.1)   |        |
| <i>ECT electrode placement</i>       |              |            | 0.013  |
| <i>Unilateral</i>                    | 1,642 (96.7) | 907 (94.4) |        |
| <i>Bilateral</i>                     | 56 (3.3)     | 52 (5.4)   |        |
| <i>ECT pulse width</i>               |              |            | <0.001 |
| <i>Ultrabrief pulse (&lt;0.5 ms)</i> | 1,573 (92.7) | 841 (87.5) |        |
| <i>Brief pulse (0.5-1 ms)</i>        | 125 (7.4)    | 120 (12.5) |        |

Table S2: logistic model of the binary outcome of continuing in ECT through treatment #10 vs. discontinuing prior to this point, with age, sex, diagnosis (major depressive disorder, bipolar affective disorder, other), location at the time of first treatment (inpatient vs. outpatient), baseline QIDS, baseline MoCA, and baseline BASIS-24 as descriptor variables. Bolded values are significant at the level of  $p < 0.05$ .

| <i>Predictors</i> | <i>Odds Ratio</i> | <i>CI</i>   | <i>p</i>     |
|-------------------|-------------------|-------------|--------------|
| <i>Age</i>        | 1                 | 1.00 – 1.01 | 0.164        |
| <i>Sex (male)</i> | 0.89              | 0.75 – 1.05 | 0.169        |
| <i>Diagnosis</i>  |                   |             |              |
| <i>MDD</i>        | 1.42              | 1.00 – 2.00 | <b>0.048</b> |
| <i>BPAD</i>       | 1.18              | 0.81 – 1.71 | 0.386        |

|                                  |      |             |                  |
|----------------------------------|------|-------------|------------------|
| <i>Location<br/>(outpatient)</i> | 1.51 | 1.26 – 1.82 | <b>&lt;0.001</b> |
| <i>Baseline QIDS</i>             | 1.04 | 1.01 – 1.06 | <b>0.004</b>     |
| <i>Baseline BASIS-24</i>         | 0.72 | 0.58 – 0.89 | <b>0.003</b>     |
| <i>Baseline MoCA</i>             | 1.05 | 1.02 – 1.07 | <b>0.001</b>     |
